# Supplementary material for: Prospective Measures of Adherence by Questionnaire, Low Immunosuppression and Graft Outcome in Kidney Transplantation
Source: MDPI journal article supplement (doi:10.3390/jcm10092032), 2021-05-10
Supplement: s1 [file s1]

**Table S1.** Association between CNl trough level and treatment adherence assessed by the Morisky scale

|                                  | Non adherent patients* | Adherent patients* | p-value <sup>‡</sup> |
|----------------------------------|------------------------|--------------------|----------------------|
| <b>Treatment by tacrolimus</b>   |                        |                    |                      |
| At 3 months                      | 8.7 (2.0)              | 9.2 (2.7)          | 0.33                 |
| At 6 months                      | 8.4 (2.0)              | 8.2 (2.1)          | 0.58                 |
| At 12 months                     | 7.6 (2.4)              | 7.9 (2.6)          | 0.55                 |
| At 24 months                     | 7.9 (2.5)              | 7.6 (2.4)          | 0.44                 |
| <b>Treatment by cyclosporine</b> |                        |                    |                      |
| At 3 months                      | 147.3 (30.0)           | 164 (46.0)         | 0.31                 |
| At 6 months                      | 147.1 (42.3)           | 147.3 (52.6)       | 0.99                 |
| At 12 months                     | 123.1 (41.9)           | 127.3 (45.6)       | 0.77                 |
| At 24 months                     | 87.8 (34.2)            | 98.4 (46.4)        | 0.52                 |

\*assessed by the Morisky scale at the time of CNl trough levels measures

<sup>‡</sup>assessed by Student test

**Table S2.** Factors associated with occurrence of acute rejection over the 5 years post transplantation.

|                                                           | N   | No rejection<br>(n=228) | At least one<br>rejection<br>(n=73) | P value      |
|-----------------------------------------------------------|-----|-------------------------|-------------------------------------|--------------|
| <b>Age</b> (years), mean (SD)                             | 301 | 50.0 (12.3)             | 47.8 (15.4)                         | 0.27         |
| <b>Male</b> , n (%)                                       | 301 | 154 (67.5)              | 54 (74.0)                           | 0.30         |
| <b>Primary kidney disease</b>                             | 295 |                         |                                     | 0.42         |
| Vascular, n (%)                                           |     | 8 (3.6)                 | 2 (2.8)                             |              |
| Diabetics, n (%)                                          |     | 32 (9.4)                | 3 (4.2)                             |              |
| Glomerulonephritis, n (%)                                 |     | 62 (27.8)               | 20 (27.8)                           |              |
| Tubulo-interstitial, n (%)                                |     | 24 (10.8)               | 7 (9.7)                             |              |
| Hereditary (including polycystic kidney disease), n (%)   |     | 51 (22.9)               | 13 (18.1)                           |              |
| Other or undetermined, n (%)                              |     | 57 (25.6)               | 27 (37.5)                           |              |
| <b>Number of previous graft(s)</b>                        | 271 |                         |                                     | 0.71         |
| 0, n (%)                                                  |     | 167 (81.9)              | 57 (85.1)                           |              |
| 1, n (%)                                                  |     | 31 (15.2)               | 10 (14.9)                           |              |
| ≥ 2, n (%)                                                |     | 6 (2.9)                 | 0 (0.0)                             |              |
| <b>Sensitized patients</b> , n (%)                        | 226 | 45 (27.1)               | 16 (26.7)                           | 0.95         |
| <b>Donor age</b> (years), mean (SD)                       | 278 | 49.0 (15.6)             | 49.7 (16.8)                         | 0.76         |
| <b>Living donor</b> , n (%)                               | 298 | 8 (3.5)                 | 1 (1.4)                             | 0.69         |
| <b>Expanded criteria donor</b> , n (%)                    | 274 | 86 (41.8)               | 30 (44.1)                           | 0.73         |
| <b>Number of HLA mismatches (A-B-DR)</b>                  | 295 |                         |                                     | 0.22         |
| 0 - 1, n (%)                                              |     | 11 (4.9)                | 2 (2.9)                             |              |
| 2 - 4, n (%)                                              |     | 131 (58.2)              | 34 (48.6)                           |              |
| 5 - 6, n (%)                                              |     | 83 (36.9)               | 34 (48.6)                           |              |
| <b>Total ischemia time</b> (hours), mean (SD)             | 269 | 16.2 (6.4)              | 16.5 (5.7)                          | 0.72         |
| <b>Induction treatment</b>                                | 276 |                         |                                     | 0.60         |
| Basiliximab, n (%)                                        |     | 126 (60.0)              | 42 (63.6)                           |              |
| rATG, n (%)                                               |     | 84 (40.0)               | 24 (36.4)                           |              |
| <b>Delayed graft function</b> , n (%)                     | 292 | 46 (20.6)               | 15 (21.7)                           | 0.84         |
| <b>Maintenance treatment at 3 months post-transplant</b>  | 271 |                         |                                     | <b>0.002</b> |
| Cyclosporine                                              |     | 42 (18.6)               | 18 (40.0)                           |              |
| Tacrolimus                                                |     | 181 (80.1)              | 25 (55.6)                           |              |
| Without CNI                                               |     | 3 (1.3)                 | 2 (4.4)                             |              |
| <b>Maintenance treatment at 6 months post-transplant</b>  | 255 |                         |                                     | <b>0.01</b>  |
| Cyclosporine                                              |     | 45 (20.1)               | 10 (32.3)                           |              |
| Tacrolimus                                                |     | 175 (78.1)              | 18 (58.1)                           |              |
| Without CNI                                               |     | 4 (1.8)                 | 3 (9.7)                             |              |
| <b>Maintenance treatment at 12 months post-transplant</b> | 241 |                         |                                     | <b>0.005</b> |
| Cyclosporine                                              |     | 42 (19.0)               | 9 (45.0)                            |              |
| Tacrolimus                                                |     | 171 (77.4)              | 9 (45.0)                            |              |
| Without CNI                                               |     | 8 (3.6)                 | 2 (10.0)                            |              |
| <b>Maintenance treatment at 24 months post-transplant</b> | 227 |                         |                                     | 0.39         |
| Cyclosporine                                              |     | 41 (19.0)               | 3 (27.3)                            |              |
| Tacrolimus                                                |     | 164 (75.9)              | 7 (63.6)                            |              |
| Without CNI                                               |     | 11 (5.1)                | 1 (9.1)                             |              |
| <b>Corticosteroids at 3 months</b>                        | 301 |                         |                                     | 0.06         |
| Continued                                                 |     | 188 (82.5)              | 67 (91.8)                           |              |
| Discontinued                                              |     | 40 (17.5)               | 6 (8.2)                             |              |

N : subjects with available data ; SD : standard deviation ; HLA : Human Leucocyte Antigen

**Table S3.** Effect of non-adherence measured by the Morisky scale and immunosuppression regimen on the hazard of acute rejection. Results of Cox proportional hazard model. Multivariable analysis.

|                                             | 3 months (N = 246) |                       |         | 6 months (N = 228) |                        |         | 12 months (N = 220) |                        |         | 24 months (N = 189) |               |         |
|---------------------------------------------|--------------------|-----------------------|---------|--------------------|------------------------|---------|---------------------|------------------------|---------|---------------------|---------------|---------|
|                                             | HR*                | CI<br>95%             | p-value | HR*                | CI<br>95%              | p-value | HR*                 | CI<br>95%              | p-value | HR*                 | CI<br>95%     | p-value |
| <b>Non adherent vs adherent<sup>†</sup></b> | 0.93               | 0.40-<br>2.15         | 0.94    | 1.19               | 0.52-<br>2.75          | 0.77    | 0.52                | 0.17-<br>1.59          | 0.27    | 0.57                | 0.11-<br>2.91 | 0.60    |
| Maintenance treatment                       |                    |                       | 0.001   |                    |                        | 0.0008  |                     |                        | 0.005   |                     |               | 0.52    |
| Tacrolimus                                  | 1                  |                       |         | 1                  |                        |         | 1                   |                        |         | 1                   |               |         |
| Cyclosporine                                | <b>2.68</b>        | <b>1.42-<br/>5.08</b> |         | 2.08               | 0.92-<br>4.71          |         | <b>4.07</b>         | <b>1.57-<br/>10.57</b> |         | 1.60                | 0.31-<br>8.27 |         |
| Without anticalcineurin                     | <b>4.48</b>        | <b>1.27-<br/>17.7</b> |         | <b>6.97</b>        | <b>1.99-<br/>24.41</b> |         | <b>5.78</b>         | <b>1.21-<br/>27.5</b>  |         | 2.99                | 0.34-<br>26.4 |         |

HR: Hazard ratio ; CI: Confidence Interval ; N = Subjects with complete data, with a functioning graft at time of measure of NA and without acute rejection before this time ; <sup>†</sup>Subjects with at least one positive response to Morisky scale at time of measure. \* adjusted for adherence status and maintenance treatment measured at the time mentioned above

**Table S4.** Factors associated with risk of graft failure defined as death, return to dialysis or retransplantation. Results of univariate Cox model.

|                                                                 | N   | HR          | CI 95%           | p-value      |
|-----------------------------------------------------------------|-----|-------------|------------------|--------------|
| <b>Recipient age, per year</b>                                  | 297 | 1.02        | 0.99-1.03        | 0.08         |
| <b>Female sex</b>                                               | 297 | 0.71        | 0.43-1.16        | 0.17         |
| <b>Primary kidney disease</b>                                   | 292 |             |                  | 0.98         |
| Vascular, n (%)                                                 |     | 1           |                  |              |
| Diabetics, n (%)                                                |     | 1.10        | 0.28-4.25        |              |
| Glomerulonephritis, n (%)                                       |     | 1.10        | 0.33-3.65        |              |
| Tubulo-interstitial, n (%)                                      |     | 0.87        | 0.23-3.28        |              |
| Hereditary (including PKD), n (%)                               |     | 0.81        | 0.24-2.79        |              |
| Other, n (%)                                                    |     | 0.91        | 0.26-3.22        |              |
| Undetermined, n (%)                                             |     | 1.14        | 0.32-4.15        |              |
| Multiples, n (%)                                                |     | 0.76        | 0.08-7.25        |              |
| <b>Number of previous grafts, per unit</b>                      | 269 | 0.93        | 0.57-1.51        | 0.77         |
| <b>Preemptive transplantation</b>                               | 296 | 0.59        | 0.24-1.47        | 0.26         |
| <b>Transplant with a living donor</b>                           | 295 | 0.33        | 0.05-2.41        | 0.28         |
| <b>Donor age, per year</b>                                      | 275 | 1.02        | 1.01-1.04        | <b>0.007</b> |
| <b>Transplant with an expanded criteria donor</b>               | 271 | 1.48        | 0.95-2.30        | 0.08         |
| <b>Number of HLA mismatches, per unit</b>                       | 292 | 1.00        | 0.85-1.18        | 0.968        |
| <b>Induction treatment</b>                                      | 272 |             |                  | 0.47         |
| Basiliximab, n (%)                                              |     | 1           |                  |              |
| rATG, n (%)                                                     |     | 1.19        | 0.74-1.91        |              |
| <b>Total ischemia time, per hour</b>                            | 266 | 1.02        | 0.98-1.05        | 0.38         |
| <b>Occurrence of a delayed graft function</b>                   | 289 | 1.38        | 0.83-2.29        | 0.21         |
| <b>Maintenance treatment at 3 months</b>                        | 296 |             |                  | 0.08         |
| Tacrolimus                                                      |     | 1           |                  |              |
| Cyclosporine                                                    |     | <b>1.68</b> | <b>1.06-2.66</b> |              |
| Without CNI                                                     |     | 0.73        | 0.10-5.26        |              |
| <b>Maintenance treatment at 6 months</b>                        | 294 |             |                  | 0.10         |
| Tacrolimus                                                      |     | 1           |                  |              |
| Cyclosporine                                                    |     | <b>1.62</b> | <b>1.01-2.60</b> |              |
| Without CNI                                                     |     | 0.50        | 0.07-3.62        |              |
| <b>Maintenance treatment at 12 months</b>                       | 291 |             |                  | 0.24         |
| Tacrolimus                                                      |     | 1           |                  |              |
| Cyclosporine                                                    |     | 1.51        | 0.91-2.51        |              |
| Without CNI                                                     |     | 1.53        | 0.55-4.22        |              |
| <b>Maintenance treatment at 24 months</b>                       | 282 |             |                  | 0.23         |
| Tacrolimus                                                      |     | 1           |                  |              |
| Cyclosporine                                                    |     | 1.51        | 0.88-2.59        |              |
| Without CNI                                                     |     | 1.64        | 0.65-4.12        |              |
| <b>CNI trough levels at 3 months</b>                            | 239 |             |                  | 0.93         |
| Standard CNI through levels                                     |     | 1           |                  |              |
| Low CNI through levels                                          |     | 1.09        | 0.34-3.46        |              |
| Without CNI                                                     |     | 0.71        | 0.10-5.13        |              |
| <b>CNI trough levels at 6 months</b>                            | 253 |             |                  | 0.66         |
| Standard CNI through levels                                     |     | 1           |                  |              |
| Low CNI through levels                                          |     | 1.22        | 0.56-2.67        |              |
| Without CNI                                                     |     | 0.48        | 0.07-3.44        |              |
| <b>CNI trough levels at 12 months</b>                           | 253 |             |                  | 0.25         |
| Standard CNI through levels                                     |     | 1           |                  |              |
| Low CNI through levels                                          |     | 1.62        | 0.84-3.12        |              |
| Without CNI                                                     |     | 1.66        | 0.60-4.60        |              |
| <b>CNI trough levels at 24 months</b>                           | 248 |             |                  | <b>0.007</b> |
| Standard CNI through levels                                     |     | 1           |                  |              |
| Low CNI through levels                                          |     | <b>2.36</b> | <b>1.37-4.07</b> |              |
| Without CNI                                                     |     | 1.84        | 0.73-4.67        |              |
| <b>Corticosteroids discontinued at 3 months post transplant</b> | 296 | 0.99        | 0.55-1.78        | 0.96         |

|                                                                                    |     |      |           |               |
|------------------------------------------------------------------------------------|-----|------|-----------|---------------|
| <b>Occurrence of <i>de novo</i> DSA between 2 and 3 years post transplantation</b> | 219 | 3.26 | 1.70-6.28 | <b>0.0004</b> |
| <b>Occurrence of acute rejection</b>                                               | 297 | 2.10 | 1.35-3.26 | <b>0.001</b>  |

---

N : number of available data ; HR : Hazard Ratio ;

**Table S5.** Effect of non-adherence measured by the Morisky scale and immunosuppression regimen (standard CNI trough level / low CNI trough level / any anticalcineurin) on the hazard of graft failure since the third year post transplantation. Results of Cox proportional hazard model. Multivariable analysis.

|                                                                   | 3 months (N <sup>‡</sup> = 155) |                    |             | 6 months (N <sup>‡</sup> = 158) |                    |              | 12 months (N <sup>‡</sup> = 168) |                    |             | 24 months (N <sup>‡</sup> = 149) |              |         |
|-------------------------------------------------------------------|---------------------------------|--------------------|-------------|---------------------------------|--------------------|--------------|----------------------------------|--------------------|-------------|----------------------------------|--------------|---------|
|                                                                   | HR*                             | CI 95%             | p-value     | HR*                             | CI 95%             | p-value      | HR*                              | CI 95%             | p-value     | HR*                              | CI 95%       | p-value |
| <b>Non adherent vs adherent<sup>†</sup></b>                       | 1.03                            | 0.40 – 2.62        | 0.98        | 1.01                            | 0.45 – 2.24        | 0.85         | 0.77                             | 0.37 – 1.62        | 0.45        | 0.97                             | 0.49 – 1.92  | 0.99    |
| Recipient age ( <i>per year</i> )                                 | 0.99                            | 0.96 – 1.04        | 0.75        | 1.01                            | 0.97 – 1.05        | 0.68         | 1.02                             | 0.98 – 1.05        | 0.42        | 0.99                             | 0.96 – 1.03  | 0.79    |
| Donor age                                                         |                                 |                    | 0.54        |                                 |                    | 0.77         |                                  |                    | 0.88        |                                  |              | 0.25    |
|                                                                   | 1                               |                    |             | 1                               |                    |              | 1                                |                    |             | 1                                |              |         |
|                                                                   | 1.53                            | 0.50 – 4.62        |             | 1.23                            | 0.41 – 3.66        |              | 1.19                             | 0.42 – 3.34        |             | 2.11                             | 0.62 – 7.17  |         |
|                                                                   | 2.43                            | 0.72 – 8.15        |             | 1.75                            | 0.58 – 5.31        |              | 1.52                             | 0.50 – 4.66        |             | 2.87                             | 0.80 – 10.29 |         |
|                                                                   | 2.70                            | 0.63 – 11.61       |             | 1.32                            | 0.34 – 5.18        |              | 1.63                             | 0.43 – 6.08        |             | 4.41                             | 1.05 – 18.57 |         |
| <b>Maintenance treatment</b>                                      |                                 |                    | 0.42        |                                 |                    | 0.29         |                                  |                    | 0.78        |                                  |              | 0.20    |
| Standard CNI trough level ©                                       | 1                               |                    |             | 1                               |                    |              | 1                                |                    |             | 1                                |              |         |
| Low CNI trough level ®                                            | 0.48                            | 0.10 – 2.40        |             | 1.17                            | 0.39 – 3.50        |              | 0.87                             | 0.39 – 1.96        |             | 1.88                             | 0.94 – 3.76  |         |
| Without anticalcineurin                                           | 0.55                            | 0.07 – 4.50        |             | 0.26                            | 0.03 – 1.98        |              | 0.84                             | 0.25 – 2.86        |             | 1.98                             | 0.71 – 5.51  |         |
| Occurrence of acute rejection (time-dependent variable)           | <b>2.13</b>                     | <b>1.04 – 4.35</b> | <b>0.03</b> | <b>2.25</b>                     | <b>1.14 – 4.44</b> | <b>0.01</b>  | <b>1.93</b>                      | <b>1.01 – 3.68</b> | <b>0.04</b> | 1.90                             | 0.98 – 3.67  | 0.08    |
| Occurrence of <i>dn</i> DSA between 2 and 3 years post-transplant | <b>2.66</b>                     | <b>1.09 – 6.45</b> | 0.03        | <b>3.74</b>                     | <b>1.55 – 9.04</b> | <b>0.001</b> | <b>2.39</b>                      | <b>1.07 – 5.37</b> | 0.03        | 1.84                             | 0.74 – 4.53  | 0.17    |

HR: Hazard ratio ; CI: Confidence Interval ; <sup>‡</sup>Subjects with complete data and with a functioning graft at 3 years post-transplant; <sup>†</sup>Subjects with at least one positive response to Morisky scale at time of measure. © defined as tacrolimus trough levels ≥ 5 ng/ml or ciclosporin trough levels ≥ 100 ng/ml. ® defined as tacrolimus trough levels ≤ 5 ng/ml or ciclosporin trough levels ≤ 100 ng/ml. \*adjusted for recipient and donor age, maintenance treatment at time of measure of NA, occurrence of acute rejection (time dependent variable) and occurrence of *dn*DSA between 2 and 3 years post transplant
